# Supplementary material for: Comparison among fertility-sparing therapies for well differentiated early-stage endometrial carcinoma and complex atypical hyperplasia
Source: PubMed Central journal article supplement (PMC5593673; doi:10.18632/oncotarget.17588), 2017-05-03
Supplement: oncotarget-08-57642-s001.pdf [file oncotarget-08-57642-s001.pdf]

# Comparison among fertility-sparing therapies for well differentiated early-stage endometrial carcinoma and complex atypical hyperplasia

## Supplementary Materials

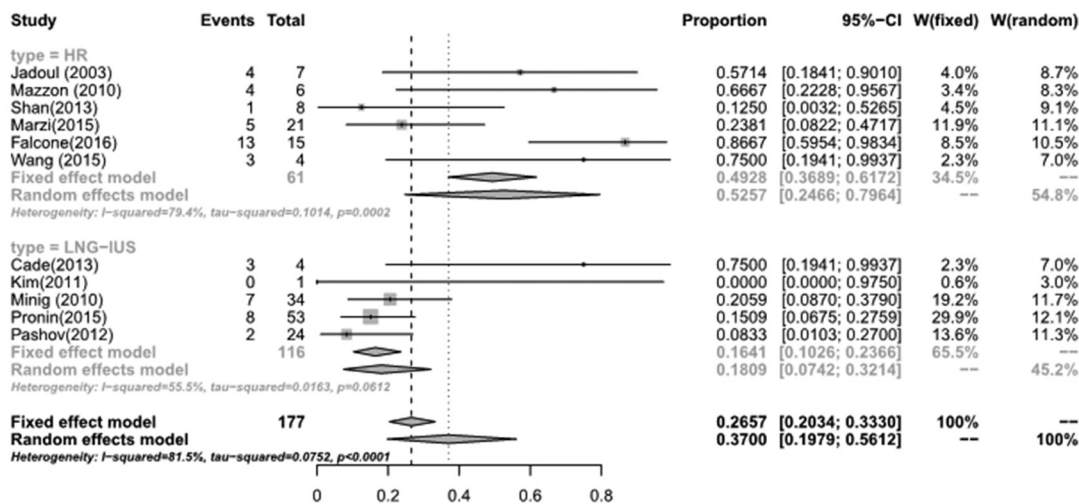

Supplementary Figure 1: Live birth rate between hysteroscopic resection (HR) and LNG-IUS.

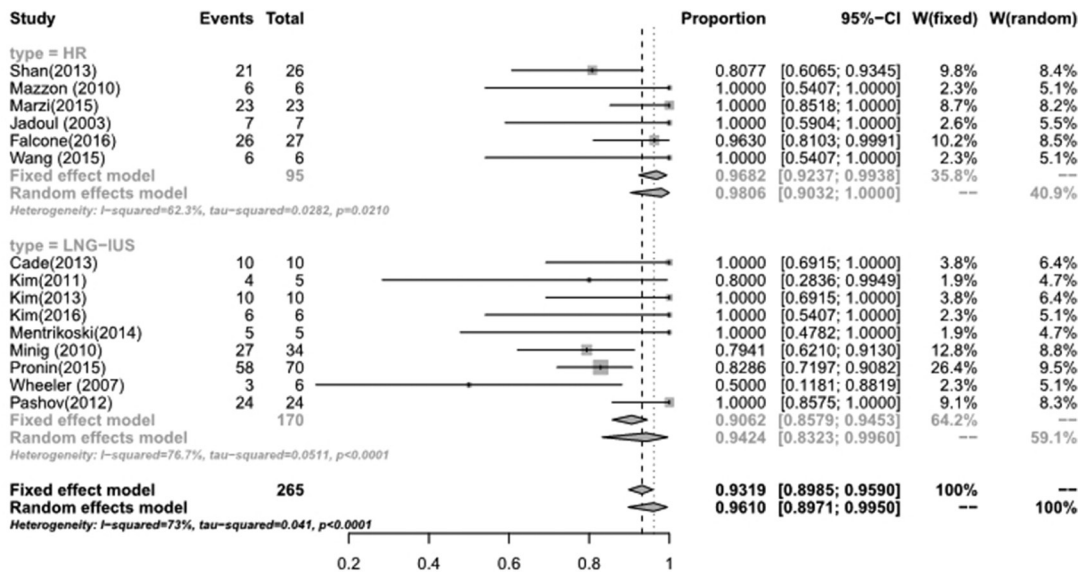

Supplementary Figure 2: Regression rate between hysteroscopic resection (HR) and LNG-IUS.

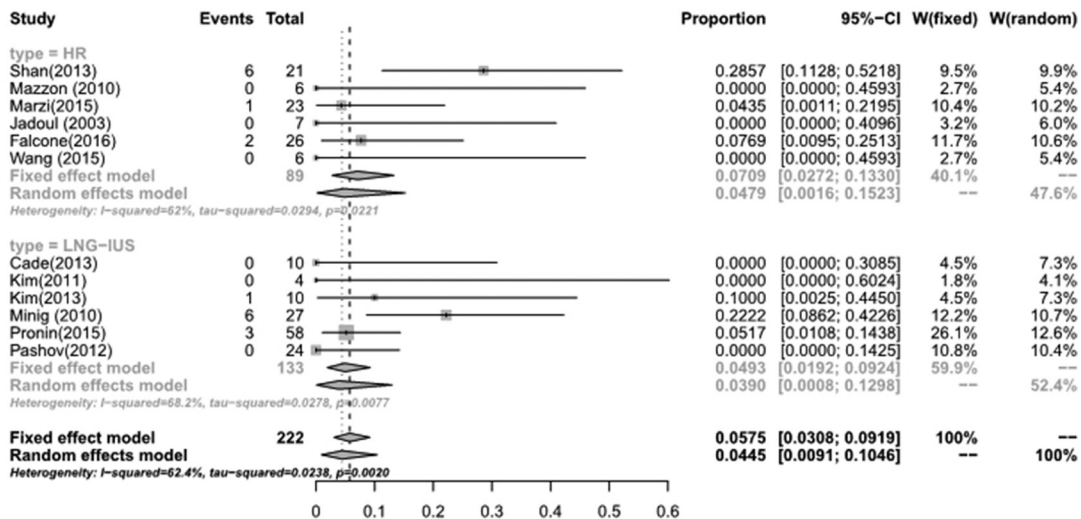

Supplementary Figure 3: Recurrence rate between hysteroscopic resection (HR) and LNG-IUS.

### Supplementary Table 1: Regression, recurrence and live birth rate of HR and levonorgestrel-releasing intrauterine system (LNG-IUS)

|                 | Number of studies | Test for Heterogeneity ( <i>I</i> <sup>2</sup> ) | Test for Heterogeneity: ( <i>p</i> value of <i>Q</i> test) | Fixed effect model (effect size, 95% CI) | Random effects model (effect size, 95% CI) | <i>P</i> value |
|-----------------|-------------------|--------------------------------------------------|------------------------------------------------------------|------------------------------------------|--------------------------------------------|----------------|
| Regression rate |                   |                                                  |                                                            |                                          |                                            | <b>0.4098</b>  |
| In HR           | 6                 | 62.3%                                            | 0.0210                                                     | 0.9682 [0.9237; 0.9938]                  | 0.9806 [0.9032;1.0000]                     |                |
| In LNG-IUS      | 9                 | 76.7%                                            | < 0.0001                                                   | 0.9062 [0.8579; 0.9453]                  | 0.9424 [0.8323;0.9960]                     |                |
| Recurrence rate |                   |                                                  |                                                            |                                          |                                            | <b>0.8561</b>  |
| In HR           | 6                 | 62%                                              | 0.0221                                                     | 0.0709 [0.0272; 0.1330]                  | 0.0479 [0.0016;0.1523]                     |                |
| In LNG-IUS      | 6                 | 68.2%                                            | 0.0077                                                     | 0.0493 [0.0192; 0.0924]                  | 0.0390 [0.0008;0.1298]                     |                |
| Live birth rate |                   |                                                  |                                                            |                                          |                                            | <b>0.0399</b>  |
| In HR           | 6                 | 79.4%                                            | 0.0002                                                     | 0.4928 [0.3689; 0.6172]                  | 0.5257 [0.2466;0.7964]                     |                |
| In LNG-IUS      | 5                 | 55.5%                                            | 0.0612                                                     | 0.1641 [0.1026; 0.2366]                  | 0.1809 [0.0742;0.3214]                     |                |

### Supplementary Table 2: Regression, recurrence and live birth rate of oral progestogens (P) for eEC and CAH

|                 | Number of studies | Test for Heterogeneity ( <i>I</i> <sup>2</sup> ) | Test for Heterogeneity: ( <i>p</i> value of <i>Q</i> test) | Fixed effect model (effect size, 95% CI) | Random effects model (effect size, 95% CI) | <i>P</i> value |
|-----------------|-------------------|--------------------------------------------------|------------------------------------------------------------|------------------------------------------|--------------------------------------------|----------------|
| Regression rate |                   |                                                  |                                                            |                                          |                                            | <b>0.0417</b>  |
| For CAH         | 24                | 68.1%                                            | < 0.0001                                                   | 0.8916 [0.8557; 0.9229]                  | 0.8874 [0.8170;0.9425]                     |                |
| For eEC         | 40                | 71.1%                                            | < 0.0001                                                   | 0.7841 [0.7536; 0.8130]                  | 0.7947 [0.7319; 0.8510]                    |                |
| Recurrence rate |                   |                                                  |                                                            |                                          |                                            | <b>0.0044</b>  |
| For CAH         | 20                | 64%                                              | < 0.0001                                                   | 0.0883 [0.0562; 0.1268]                  | 0.0920 [0.0391; 0.1643]                    |                |
| For eEC         | 35                | 81.1%                                            | < 0.0001                                                   | 0.2764 [0.2386; 0.3157]                  | 0.2734 [0.1819; 0.3756]                    |                |
| Live birth rate |                   |                                                  |                                                            |                                          |                                            | <b>0.7247</b>  |
| For CAH         | 15                | 50.8%                                            | 0.0125                                                     | 0.2739 [0.2093; 0.3436]                  | 0.2874 [0.1920; 0.3935]                    |                |
| For eEC         | 32                | 76.6%                                            | < 0.0001                                                   | 0.3520 [0.3076; 0.3978]                  | 0.3228 [0.2287; 0.4248]                    |                |

### Supplementary Table 3: Regression, recurrence and live birth rate of oral progestogens (P) and levonorgestrel-releasing intrauterine system (LNG-IUS)

|                 | Number of studies | Test for Heterogeneity ( <i>I</i> <sup>2</sup> ) | Test for Heterogeneity: ( <i>p</i> value of <i>Q</i> test) | Fixed effect model (effect size, 95% CI) | Random effects model (effect size, 95% CI) | <i>P</i> value |
|-----------------|-------------------|--------------------------------------------------|------------------------------------------------------------|------------------------------------------|--------------------------------------------|----------------|
| Regression rate |                   |                                                  |                                                            |                                          |                                            | <b>0.0010</b>  |
| In LNG-IUS      | 9                 | 76.7%                                            | < 0.0001                                                   | 0.9062 [0.8579; 0.9453]                  | 0.9424 [0.8323;0.9960]                     |                |
| In P            | 45                | 62.7%                                            | < 0.0001                                                   | 0.7712 [0.7454; 0.7960]                  | 0.7720 [0.7258; 0.8151]                    |                |
| Recurrence rate |                   |                                                  |                                                            |                                          |                                            | <b>0.0001</b>  |
| In LNG-IUS      | 6                 | 68.2%                                            | 0.0077                                                     | 0.0493 [0.0192; 0.0924]                  | 0.0390 [0.0008; 0.1298]                    |                |
| In P            | 39                | 76.5%                                            | <0.0001                                                    | 0.3029 [0.2708; 0.3359]                  | 0.3217 [0.2506; 0.3971]                    |                |
| Live birth rate |                   |                                                  |                                                            |                                          |                                            | <b>0.1242</b>  |
| In LNG-IUS      | 5                 | 55.5%                                            | 0.0612                                                     | 0.1641 [0.1026; 0.2366]                  | 0.1809 [0.0742; 0.3214]                    |                |
| In P            | 37                | 67.8%                                            | <0.0001                                                    | 0.3476 [0.3107; 0.3855]                  | 0.3368 [0.2687; 0.4084]                    |                |

### Supplementary Table 4: Characteristics of the studies. See Supplementary\_Table\_4
